# Supplementary material for: Lithium in patients with amyotrophic lateral sclerosis (LiCALS): a phase 3 multicentre, randomised, double-blind, placebo-controlled trial
Source: PubMed Central journal article supplement (PMC3610091; doi:10.1016/s1474-4422(13)70037-1), 2013-04
Supplement: mmc1.pdf [file mmc1.pdf]

# THE LANCET **Neurology**

## **Supplementary webappendix**

This webappendix formed part of the original submission and has been peer reviewed. We post it as supplied by the authors.

Supplement to: UKMND-LiCALS Study Group. Lithium in patients with amyotrophic lateral sclerosis (LiCALS): a phase 3 multicentre, randomised, double-blind, placebo-controlled trial. *Lancet Neurol* 2013; published online Feb 27. [http://dx.doi.org/10.1016/S1474-4422\(13\)70037-1](http://dx.doi.org/10.1016/S1474-4422(13)70037-1).

## Web extra material

|                 |                                                          | Treatment allocation |                   | Total |
|-----------------|----------------------------------------------------------|----------------------|-------------------|-------|
|                 |                                                          | Control              | LiCO <sub>3</sub> |       |
| Clinician guess | I strongly think he/she was prescribed active medication | 1                    | 6                 | 7     |
|                 | I think he/she was prescribed active medication          | 35                   | 36                | 71    |
|                 | I think he/she was prescribed placebo                    | 35                   | 22                | 57    |
|                 | I strongly think he/she was prescribed placebo           | 5                    | 0                 | 5     |
| <b>Total</b>    |                                                          | 76                   | 64                | 140   |

**Table S1. Clinician guess of treatment allocation**

|               |                                                     | Treatment allocation |                   | Total |
|---------------|-----------------------------------------------------|----------------------|-------------------|-------|
|               |                                                     | Control              | LiCO <sub>3</sub> |       |
| Patient guess | I strongly think I was prescribed active medication | 4                    | 12                | 16    |
|               | I think I was prescribed active medication          | 18                   | 17                | 35    |
|               | I think I was prescribed placebo                    | 27                   | 13                | 40    |
|               | I strongly think I was prescribed placebo           | 17                   | 13                | 30    |
| <b>Total</b>  |                                                     | 66                   | 55                | 121   |

**Table S2. Patient guess of treatment allocation**

| Centre     | Treatment allocation |         | Total |
|------------|----------------------|---------|-------|
|            | Placebo              | Lithium |       |
| Birmingham | 14                   | 12      | 26    |
| KCL        | 10                   | 9       | 19    |
| Liverpool  | 12                   | 13      | 25    |
| Manchester | 11                   | 11      | 22    |
| NHNN       | 11                   | 11      | 22    |
| Newcastle  | 9                    | 9       | 18    |
| Oxford     | 13                   | 12      | 25    |
| Plymouth   | 9                    | 10      | 19    |
| Preston    | 7                    | 9       | 16    |
| Sheffield  | 11                   | 11      | 22    |
|            | 107                  | 107     | 214   |

**Table S3. Recruitment from each centre**

| n     | Frequency | Percent |
|-------|-----------|---------|
| 0     | 3         | 2.8     |
| 1     | 3         | 2.8     |
| 2     | 5         | 4.7     |
| 3     | 8         | 7.5     |
| 4     | 4         | 3.7     |
| 5     | 11        | 10.3    |
| 6     | 12        | 11.2    |
| 7     | 16        | 15.0    |
| 8     | 14        | 13.1    |
| 9     | 12        | 11.2    |
| 10    | 13        | 12.1    |
| 11    | 4         | 3.7     |
| 12    | 1         | .9      |
| 13    | 1         | .9      |
| Total | 107       | 100.0   |

**Table S4. The number of measurements within the therapeutic range.**

For the 104 patients achieving therapeutic range, the proportion of subsequent measurements achieving therapeutic range varied from 15% to 100% with a mean of 82.1%. Thus the majority of patients spent the majority of time in the therapeutic range. 25 patients (23.4%) had at least one measurement above the recommended upper threshold of 0.8mmol/L. Typically this was a single value that occurred while the appropriate dose for a patient was being ascertained.

| Measure         | Annual rate of change in health status – Separate longitudinal analysis |               |                   |               |            |             |                                   |               |                   |               |            |             |
|-----------------|-------------------------------------------------------------------------|---------------|-------------------|---------------|------------|-------------|-----------------------------------|---------------|-------------------|---------------|------------|-------------|
|                 | Unadjusted                                                              |               |                   |               |            |             | Adjusted for randomisation strata |               |                   |               |            |             |
|                 | Control                                                                 |               | LiCO <sub>3</sub> |               | Difference |             | Control                           |               | LiCO <sub>3</sub> |               | Difference |             |
|                 |                                                                         | 95%CI         |                   | 95%CI         |            | 95%CI       |                                   | 95%CI         |                   | 95%CI         |            | 95% CI      |
| ALSFRS-R        | -9.31                                                                   | -10.05, -8.58 | -9.50             | -10.31, -8.70 | -0.19      | -1.28, 0.90 | -9.31                             | -10.04, -8.57 | -9.52             | -10.32, -8.71 | -0.21      | -1.30, 0.88 |
| HADS anxiety    | 0.12                                                                    | -0.28, 0.53   | 0.52              | 0.07, 0.96    | 0.40       | -0.21, 1.00 | 0.13                              | -0.28, 0.53   | 0.52              | 0.08, 0.97    | 0.40       | -0.21, 1.00 |
| HADS depression | 1.27                                                                    | 0.92, 1.62    | 1.53              | 1.15, 1.91    | 0.26       | -0.26, 0.78 | 1.27                              | 0.92, 1.62    | 1.54              | 1.16, 1.93    | 0.27       | -0.25, 0.79 |
| EQ5-D           | -0.26                                                                   | -0.29, -0.22  | -0.29             | -0.32, -0.25  | -0.03      | -0.08, 0.02 | -0.26                             | -0.29, -0.22  | -0.29             | -0.33, -0.25  | -0.03      | -0.08, 0.02 |
| EuroQol         | -8.88                                                                   | -11.28, -6.48 | -11.83            | -14.44, -9.21 | -2.94      | -6.49, 0.60 | -8.88                             | -11.27, -6.48 | -11.97            | -14.58, -9.36 | -3.10      | -6.64, 0.45 |

Table S5. Separate longitudinal analysis of rate of change in functional health status, quality of life and mental health state

| Measure         | Annual rate of change in health status – After joint modelling with survival data |               |                   |               |            |             |                                                |               |                   |               |            |             |
|-----------------|-----------------------------------------------------------------------------------|---------------|-------------------|---------------|------------|-------------|------------------------------------------------|---------------|-------------------|---------------|------------|-------------|
|                 | Adjusted only for survival                                                        |               |                   |               |            |             | Adjusted for survival and randomisation strata |               |                   |               |            |             |
|                 | Control                                                                           |               | LiCO <sub>3</sub> |               | Difference |             | Control                                        |               | LiCO <sub>3</sub> |               | Difference |             |
|                 |                                                                                   | 95%CI         |                   | 95%CI         |            | 95%CI       |                                                | 95%CI         |                   | 95%CI         |            | 95% CI      |
| ALSFRS-R        | -9.47                                                                             | -10.98, -8.46 | -9.75             | -11.62, -8.47 | -0.28      | -2.40, 1.67 | -9.44                                          | -10.93, -8.44 | -9.74             | -11.57, -8.44 | -0.30      | -2.43, 1.69 |
| HADS anxiety    | 0.15                                                                              | -0.29, 0.68   | 0.55              | -0.11, 1.15   | 0.41       | -0.40, 1.02 | 0.14                                           | -0.30, 0.68   | 0.54              | -0.12, 1.15   | 0.40       | -0.40, 1.02 |
| HADS depression | 1.31                                                                              | 0.87, 1.79    | 1.58              | 1.08, 2.04    | 0.27       | -0.36, 1.01 | 1.31                                           | 0.87, 1.81    | 1.60              | 1.09, 2.07    | 0.29       | -0.33, 1.02 |
| EQ5-D           | -0.26                                                                             | -0.33, -0.22  | -0.30             | -0.36, -0.24  | -0.03      | -0.12, 0.04 | -0.26                                          | -0.33, -0.22  | -0.30             | -0.36, -0.24  | -0.04      | -0.12, 0.04 |
| EuroQol         | -9.26                                                                             | -13.54, -6.80 | -12.35            | -17.93, -7.86 | -3.09      | -9.78, 1.51 | -9.21                                          | -13.46, -6.73 | -12.49            | -18.20, -8.00 | -3.29      | -9.86, 1.30 |

Table S6. Joint modelling of functional health status, quality of life and mental health state with survival data
